# Supplementary material for: Intermittent hypoxia-induced downregulation of microRNA-320b promotes lung cancer tumorigenesis by increasing CDT1 via USP37
Source: PubMed Central journal article supplement — Mol Ther Nucleic Acids. 2021 Jan 1;24:528–41. doi: 10.1016/j.omtn.2020.12.023 (PMC8056179; doi:10.1016/j.omtn.2020.12.023), 2021-01-01
Supplement: mmc1.pdf [file mmc1.pdf]

OMTN, Volume 24

## Supplemental information

### **Intermittent hypoxia-induced downregulation of microRNA-320b promotes lung cancer tumorigenesis by increasing CDT1 via USP37**

**Weihaio Li, Kai Huang, Fengbiao Wen, Guanghui Cui, Haizhou Guo, Zhanfeng He, and Song Zhao**

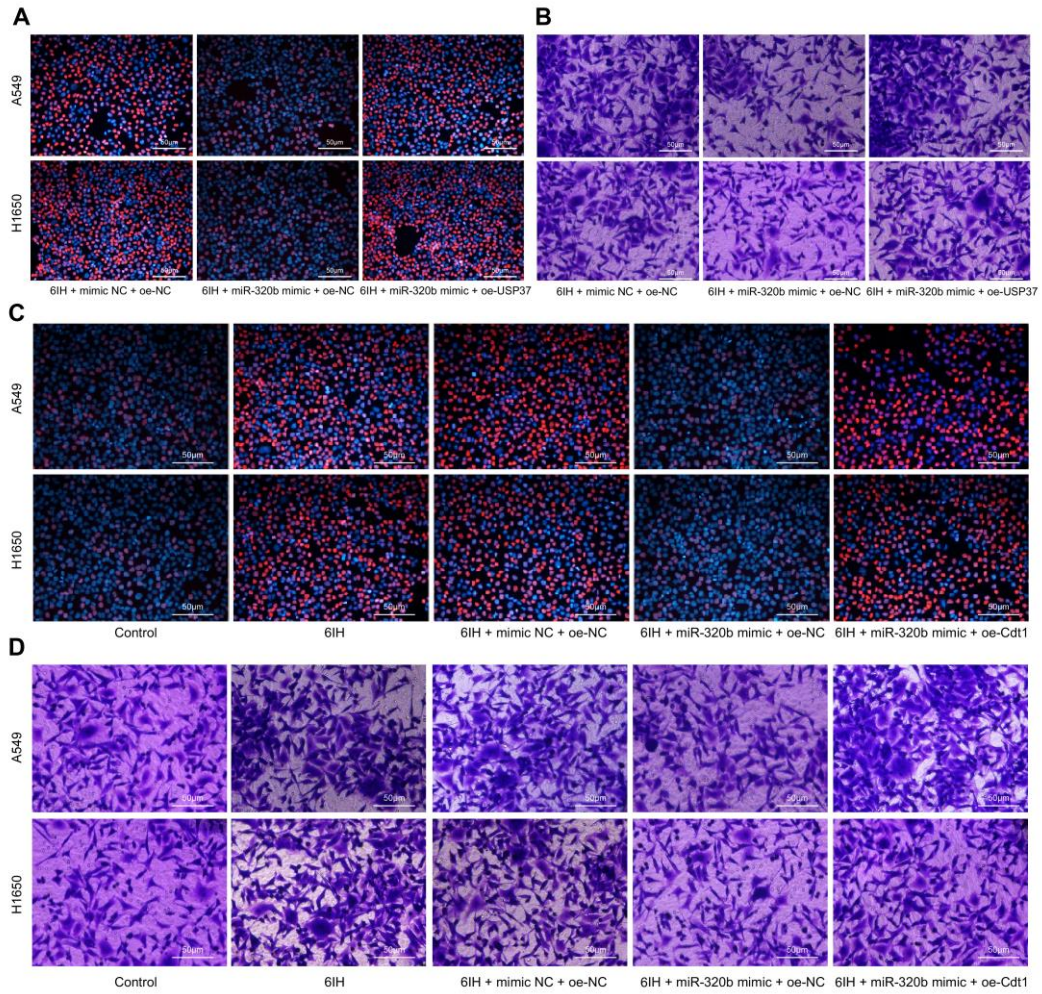

**Fig. S1.** Representative images of EdU and Transwell assays.

(A). Representative images of EdU proliferation assay measuring lung cancer cell growth for Fig. 4C (magnification 200 ×). (B). Representative images of Transwell invasion assay investigating lung cancer cell invasion potency for Fig. 4D (magnification 200 ×). (C). Representative images of EdU proliferation evaluating lung cancer cell growth for Fig. 6C (magnification 200 ×). (D). Representative images of Transwell invasion assay measuring the invasion potency of lung cancer cells for Fig. 6D (magnification 200 ×).
